# Supplementary material
Source: HighWire-hosted journal article supplement (https://cmajopen.ca/highwire/filestream/87739/field_highwire_adjunct_files/2/open-2021-0078-original-submission.pdf)
Supplement: open-2021-0078-original-submission.pdf [file open-2021-0078-original-submission.pdf]

1  
2  
3 1 **The clinical and cost effectiveness of PAV+ mode for mechanical ventilation**  
4

5 2  
6  
7 3 **Short-title:** PAV+ for mechanical ventilation in the ICU  
8

9 4  
10  
11 5 **Rhodri Saunders (DPhil)**

12 6 Coreva Scientific GmbH & Co KG  
13 7 Im Muehlenbruch 1, 3rd Floor  
14 8 53639 Koenigswinter, Germany  
15 9 rs@coreva-scientific.com  
16

17  
18 10 **Jason Davis (DPhil)**

19 11 Coreva Scientific GmbH & Co KG  
20 12 Im Muehlenbruch 1, 3rd Floor  
21 13 53639 Koenigswinter, Germany  
22 14 jd@coreva-scientific.com  
23

24 15 **Karen J. Bosma (PhD, corresponding author)**

25 16 Associate Professor of Medicine, University of Western Ontario  
26 17 Consulting Critical Care Physician, London Health Sciences Centre  
27 18 University Hospital  
28 19 339 Windermere Road, B2-194d  
29 20 London, ON, Canada N6A 5A5  
30 21 karenj.bosma@lhsc.on.ca  
31  
32

33 22  
34  
35 23 **Funding:** This study was funded by Medtronic.  
36

37 24 **Disclosures:** RS is the owner and JD an employee of Coreva Scientific GmbH & Co KG, a  
38 25 consultancy for health economics and value-based healthcare. Coreva Scientific received  
39 26 consultancy fees for its part in this research. KJB is a critical care specialist and medical lead  
40 27 in the PROMIZING clinical trial. She has previously consulted for Medtronic but received no  
41 28 remuneration for any part in this research project, the manuscript, or any associated work.  
42  
43

44 29  
45  
46  
47  
48  
49  
50  
51  
52  
53  
54  
55  
56  
57  
58  
59  
60

## 30 **Abstract**

### 31 **Background**

32 Mechanical ventilation is a cornerstone of the intensive care unit (ICU) and has been vital  
33 during the coronavirus pandemic, but it adds expense to what is already one of the highest  
34 cost care settings. As hospitals expand ICU capacity during the pandemic, optimizing  
35 provision of MV could provide patient and cost benefits, whilst also alleviating pressure on  
36 hospital capacity. Here, the cost-effectiveness of proportional-assist ventilation with load  
37 adjustable gain factors (PAV+ mode) versus pressure-support ventilation (PSV), is evaluated.

### 38 **Methods**

39 A published Markov model of the care pathway for mechanically ventilated ICU patients was  
40 adapted to the Canadian public-payer perspective. Outcomes of interest were the cost of care  
41 in year one, and the cost-effectiveness of PAV+ mode versus PSV after 20 years. Clinical and  
42 cost model inputs (2017 CAD [\$]) were informed by a structured literature review of  
43 PubMed. In an update to the published model, comparative effectiveness of PAV+ mode  
44 versus PSV was determined via pragmatic meta-analysis.

### 45 **Results**

46 PAV+ mode was considered likely to be cost-effective compared to PSV, having a cost per  
47 quality-adjusted life year gained of \$6,575 after 20 years. Over 20 years, higher care costs  
48 were driven by increased patient survival, and in cost-effectiveness acceptability analysis,  
49 95% of simulations would be cost-effective at a willingness-to-pay threshold of \$14,729.  
50 Over one year, use of PAV+ mode reduced care costs (\$53,898 versus \$60,271).

### 51 **Interpretation**

52 Use of PAV+ mode is expected to benefit patient care in the ICU and be a cost-saving or  
53 cost-effective alternative to PSV.

### 54 **Keywords**

55 Critical Care; Respiration, Artificial; Economics, Medical; Health Care Costs; Hospital Costs

## 56 **Introduction**

57 Mechanical ventilation (MV) is an important component of patient critical care. A report on  
58 intensive care unit (ICU) usage in Canada suggests 33% of ICU patients in 2013–14 needed  
59 invasive ventilation,<sup>1</sup> and MV is increasingly being used in patients admitted to the ICU.<sup>2</sup>  
60 Awareness of MV has increased in the current global coronavirus disease 2019 (COVID-19)  
61 health crisis, where ventilator support has become an essential component of care for patients  
62 suffering hypoxia and acute respiratory distress syndrome that often accompanies the  
63 disease.<sup>3</sup> A review of published studies from around the world found 29%–90% of patients  
64 with COVID-19 admitted to ICUs received invasive MV.<sup>4</sup> With COVID-19 disrupting the  
65 availability of critical care resources,<sup>6</sup> including MV, and straining hospital finances due to  
66 cancellation of elective surgeries,<sup>7</sup> there is increasing need for strategies to optimize use of

67 critical care resources. Even pre-COVID-19, Ontario alone saw ~125,000 patients requiring  
68 MV in ICUs, accounting for around 570,000 days of ventilation, from 2009–2012.<sup>5</sup>

69 Ventilation support can be delivered via a variety of modes, such as those which target a  
70 preset volume or constant pressure of inspired air. Constant pressure ventilation, in the form  
71 of pressure support ventilation (PSV), is the most common mode of ventilator support used  
72 worldwide after the initial acute phase of critical illness.<sup>5</sup> It works by delivering airflow until  
73 a target pressure is reached, and held constant for a duration that is influenced by the patient's  
74 respiratory system mechanics. While this method is effective at overcoming the resistive and  
75 elastic forces limiting the patient's capacity to sustain the work of breathing independently,  
76 clinicians cannot know the work performed by the patient's respiratory muscles. Patient-  
77 ventilator interaction can therefore be suboptimal, with risk of promoting diaphragm atrophy  
78 or inducing a form of muscle strain injury.<sup>8,9</sup> Asynchrony between patient breathing and  
79 ventilator delivery is also a potential problem of PSV,<sup>10</sup> and it has been associated with  
80 increased requirements for tracheostomy,<sup>11</sup> longer time on MV,<sup>12</sup> and higher ICU  
81 mortality.<sup>12,13</sup>

82 To improve the patient-ventilator interaction, adaptive modes of ventilation were developed,  
83 whereby the volume or pressure of air is modulated within each breath.<sup>14</sup> One such adaptive  
84 mode is proportional-assist ventilation with load-adjustable gain factors (PAV+ mode) in  
85 which respiratory system capacity is measured to help offload the respiratory muscle work in  
86 a relationship proportional to patient effort. This allows for measurement and control of the  
87 level of respiratory muscle work to ensure it remains in an optimal range,<sup>15–17</sup> and helps  
88 improve the coupling of patient and ventilator inspiratory and expiratory times.<sup>18</sup>

89 Multiple studies suggest a clinical benefit of PAV+ mode over PSV,<sup>18–20</sup> however it is  
90 unknown if increasing use of PAV+ mode in Canadian ICUs would result in resource use  
91 savings and be cost effective. In this study we synthesize available evidence to explore the  
92 utility and cost-effectiveness of PAV+ mode in the Canadian setting.

## 93 **Methods**

### 94 **Ventilation patient care pathway and model development**

95 The published Markov cohort cost-utility model<sup>21</sup> considered patient care from the point of  
96 initiating invasive MV (**Figure 1**). While on MV, patients could be synchronous or  
97 asynchronous with the ventilator. Synchronous patients had a higher probability of being  
98 stable during a spontaneous breathing trial (SBT) and progressing to extubation (being  
99 removed from the ventilator).<sup>22</sup> After successful weaning, patients were in the ICU without  
100 MV before transfer to the general ward (GW) and subsequent discharge. The model has daily  
101 cycles, such that a patient can move between health states (e.g. from asynchronous to  
102 synchronous MV, or from ICU to GW) once per day. At any stage of the pathway, patient  
103 mortality was possible. Adverse events (AEs) considered during care were tracheostomy,  
104 ventilator-associated pneumonia (VAP), other nosocomial infection, and reintubation.

105 The published model contained a single health state for “weaning”, depicted by an SBT and  
106 extubation occurring as one step.<sup>21</sup> For the Canadian setting, an additional health state of  
107 liberation was included after the SBT to formalize the weaning process and liberation from  
108 the ventilator (Figure 1). Patients failing the SBT remain on the ventilator until their next

1  
2  
3 109 SBT, while those passing are assessed for extubation. During the liberation phase, patients  
4 110 are extubated and then monitored closely to ascertain whether they can breathe unaided and  
5 111 clear secretions sufficiently without the need for an artificial airway (endotracheal tube). The  
6 112 outcomes of this state are remaining in the liberation phase (being in the ICU without MV),  
7 113 returning to MV in the ICU, or progression to the GW without MV.

#### 114 **Model outputs**

115 Outcomes of interest in this health-economic model were total costs of care and patient  
116 quality of life (QoL). Cost-effectiveness was reported as an incremental cost-effectiveness  
117 ratio (ICER), measured as the cost per quality-adjusted life year (QALY) gained.

#### 118 **Model inputs**

119 A structured literature review (see Appendix) was conducted to identify relevant data. As  
120 multiple efficacy data sources for PAV+ mode versus PSV were identified, to best  
121 summarize PAV+ mode efficacy, a pragmatic meta-analysis was performed to prevent  
122 introduction of bias from arbitrary selection of a single study (see Appendix). Additional  
123 inputs for MV that can impact on costs and patient QoL considered were initial one-off cost  
124 of PAV+ mode, time on MV, time in the ICU, time in hospital, ICU mortality, hospital  
125 mortality, occurrence of AEs, and outpatient mortality. Cost inputs from the public payer  
126 perspective, were sourced from the literature review where available and otherwise identified  
127 through reports from Canadian authorities and the Canadian Management Information  
128 Systems Database. All costs are reported in 2017 CAD (\$), with costs from earlier years  
129 inflated to 2017 using the Canadian consumer price index for healthcare (Statistics Canada,  
130 Table 326-0021). Half-cycle correction was applied to both costs and QoL.

#### 131 **Time horizon and discounting**

132 The model considers short-term (1 year) and long-term (20 years) time horizons. The former  
133 is to assess the immediate impact of a change in ventilation mode (a patient stay in ICU is  
134 often less than one month, and so all relevant clinical outcomes are realized within one year)  
135 and the latter to cover the assumed lifespan of a patient, given the base case mean age of 67  
136 years. Costs and QoL utilities (measured using the EuroQoL 5 dimensions survey [EQ-5D])  
137 incurred after the first year are discounted at 1.5% per annum in line with guidelines from the  
138 Canadian Agency for Drugs and Technologies in Health.<sup>23</sup> The full list of model parameters  
139 is provided in **Table 1**.

#### 140 **Statistical analysis**

141 The robustness of the base case results was assessed through probabilistic sensitivity analysis  
142 (PSA), whereby the model is run repeatedly (2,000 times) and for each iteration, each input  
143 parameter is sampled from a distribution around the base case (default) value. The  
144 distribution is defined by the uncertainty (standard deviation, interquartile range, or 95%  
145 confidence interval) provided in the source publication. The distribution is normal for most  
146 inputs but is log-normal for odds ratios. The results of these analyses are presented as median  
147 (95% credible interval [CrI]) and as a cost-effectiveness scatter plot. The willingness-to-pay  
148 (WTP) threshold was set at \$50,000 per QALY gained, in the suggested \$20,000 to \$100,000  
149 range.<sup>24</sup> Scenario analyses were additionally conducted.

## 150 **Ethics approval**

151 The study is an economic model informed by aggregate data from published literature. The  
152 study was deemed exempt from ethics commission review (independent assessments by the  
153 clinical author and the data protection officer of Coreva Scientific) as no human patients are  
154 treated or face risk of harm in the performance of this work.

## 155 **Results**

156 Seven clinical studies comparing PAV+ mode with PSV<sup>18–20,22,25–27</sup> were identified from  
157 studies known to the clinical author (KJB) and identified in systematic reviews.<sup>28,29</sup> As these  
158 systematic reviews<sup>28,29</sup> did not report on all outcomes required for our model, and no  
159 individual study among those identified in the literature review presented robust clinical data  
160 on the required model inputs, comparative efficacy of PAV+ mode versus PSV was  
161 determined via a pragmatic meta-analysis (see Appendix). For dichotomous endpoints, PAV+  
162 mode was associated with improved, although not always statistically significant, outcomes.  
163 PAV+ mode was associated with a significant reduction in ICU length of stay and time on  
164 MV (see Appendix). All findings were included as model inputs (**Table 1**).

### 165 **Cost-effectiveness of PAV+ mode versus PSV**

166 Base case cost-effectiveness results are shown in **Table 2**. Over one year, the cost of care per  
167 patient was \$6,373 less costly with PAV+ mode (\$53,898) compared with PSV (\$60,271). In  
168 the PSA, there was a 95.8% chance of PAV+ mode being cost saving at one year (Figure 2),  
169 with the median (95% CrI) saving being \$6,667 (-\$1,208 to \$14,782). Over one year, use of  
170 PAV+ mode resulted in 0.04 extra QALYs (0.29 vs. 0.25). The increase in QALYs occurred  
171 in 100% of simulations in the PSA, and there was a 99.6% likelihood of PAV+ mode being  
172 cost effective at the WTP threshold of \$50,000 per QALY gained.

173 Over 20 years, the cost of care per patient with PAV+ mode (\$144,041) was \$6,065 higher  
174 than with PSV (\$137,976). With PAV+ mode, patients lived on average 1.44 years longer  
175 and accumulated an additional 0.92 QALYs. In the base case, the cost per QALY gained at  
176 20 years was \$6,575 (**Table 2**). In the PSA, at 20 years there was a 19.9% chance of PAV+  
177 mode being cost saving and all simulations led to increased QALYs. The likelihood of PAV+  
178 mode being cost effective at a WTP threshold of \$50,000 was 100% with a 20-year time  
179 horizon (Figure 2).

180 Varying the WTP threshold influenced whether the use of PAV+ mode versus PSV mode  
181 would be considered cost-effective (**Figure 3**). With a time horizon of 1 year, most PSA  
182 simulations were dominant. Over a 20-year time horizon, the WTP threshold at which 95% of  
183 simulations would be considered cost-effective was found to be \$14,729.

184 Scenario analyses were performed to understand if certain model parameters were driving the  
185 results and how PAV+ mode performed in different conditions. The meta-analysis performed  
186 here determined that PAV+ mode was associated with significantly shorter time on MV and  
187 in hospital, but differences in most AEs did not reach significance. Running the model with  
188 only significant differences included did reduce the cost and QALY benefit of PAV+ mode  
189 but did not change overall outcomes (**Table 3**). At 20-years, cost and QALY outcomes for  
190 PAV+ mode versus PSV were +\$425 and +0.53, respectively, giving an ICER of \$802 per  
191 QALY gained. A younger or more female patient population had little impact on either



1  
2  
3 192 absolute or relative results (**Table 3**). The same was true if PSV had a purchase cost or if the  
4 193 difference in asynchrony between PAV+ mode and PSV was eliminated. Including costs per  
5 194 day for ICU and GWs from the Canadian Institute for Health Information rather than from  
6 195 published literature increased the saving with PAV+ mode at one year by 27.7% (**Table 3**).  
7 196 The most notable change to the base case came from use of Canadian data instead of meta-  
8 197 analysis data. In this scenario, PAV+ mode was cost saving at both 1 year (-\$8,268) and 20  
9 198 years (-\$5,857), with QoL being equal (1-year) or improved (20-year) with use of PAV+  
10 199 mode.

## 14 200 **Interpretation**

16 201 Clinicians have a medical and fiscal responsibility to choose wisely in spending healthcare  
17 202 dollars, and to optimize patient access to hospital resources and flow through the hospital  
18 203 from admission to discharge. This requires discerning which treatments are most likely to be  
19 204 clinically effective and most cost-effective for patient-important outcomes. As hospitals look  
20 205 to increase ICU capacity during the COVID-19 pandemic, health-economic models provide a  
21 206 means of modelling the economic and clinical impact of a change in intervention before  
22 207 committing to implementation.

25 208 This analysis sought to synthesize available data regarding mode of MV (PAV+ mode versus  
26 209 PSV) on patient outcomes and corresponding costs from a Canadian perspective. The  
27 210 pragmatic meta-analysis aimed to provide an objective assessment of the clinical  
28 211 effectiveness of the PAV+ mode versus PSV. Significant reductions were observed in  
29 212 patient-ventilator asynchrony and in-patient time on MV, time in the ICU, and time in  
30 213 hospital.

33 214 Applying these data to our health-economic model, we found use of PAV+ mode relative to  
34 215 PSV reduced costs to payers in year one, but increased costs over a longer time horizon. The  
35 216 cost per QALY gained over the 20-year time horizon was found to be \$6,572. Acceptability  
36 217 analysis found that PAV+ mode would be cost-effective in 95% of cases if the WTP was  
37 218 \$14,729 per QALY gained. From these results, use of PAV+ mode has a high likelihood to be  
38 219 considered cost effective in Canada.<sup>24</sup> The increased costs observed align with previous  
39 220 analyses in the United States and United Kingdom, where higher patient survival with PAV+  
40 221 mode resulted in higher costs of care (the survival paradox).<sup>21</sup> Key drivers of cost in the  
41 222 current model were time on MV and in the ICU. The reasons for PAV+ mode resulting in  
42 223 shorter time on MV and in the ICU in this model can only be surmised and may well be  
43 224 multifactorial. For example, the algorithms underlying PAV+ mode may help maintain the  
44 225 patient's respiratory muscles allowing for earlier success in SBTs and/or earlier readiness for  
45 226 liberation. Alternatively, or additionally, reduced incidence of tracheostomy may play a role  
46 227 as time to tracheostomy has been previously associated with time on MV and in the ICU.<sup>30</sup>  
47 228 Results of a large, multi-centre clinical trial [ClinicalTrials.gov Identifier: NCT02447692] are  
48 229 pending, but may help to answer these questions definitively.

54 230 There are two published meta-analyses of PAV+ mode.<sup>28,29</sup> As in our analysis, these studies  
55 231 converted data reported as a median and (interquartile) range to means and standard  
56 232 deviations for analysis using the methods of Wan et al.<sup>31</sup> (used by Kataoka et al.<sup>29</sup>) or Hozo  
57 233 et al.<sup>32</sup>(used by Vijayaraghavan et al.<sup>28</sup> via personal communication). Our results are more

234 aligned to those of Kataoka et al.<sup>29</sup> Potential reasons for this may be the consensus use of the  
235 methodology presented by Wan et al.<sup>31</sup> or the greater overlap in included studies.

### 236 **Limitations**

237 This study uses a pragmatic meta-analysis to determine the comparative effectiveness of  
238 PAV+ mode compared with PSV. As no systematic review was undertaken, there remains the  
239 potential that data relevant to the analysis were not captured. All data identified in previous  
240 meta-analyses,<sup>28,29</sup> were included, plus a prospective, observational case-control study.<sup>26</sup> The  
241 use of a computational model allowed for cost and outcomes data to be extrapolated to 20  
242 years, but no model can fully reproduce clinical practice. Results should be treated as  
243 estimates and interpreted with respect to their uncertainty and the readers' clinical judgment.  
244 Sensitivity and scenario analyses across a range of clinical parameters suggest that results are  
245 robust, but confirmation in a real-world analysis on patients is recommended.

### 246 **Conclusions**

247 Based on available evidence to date, PAV+ mode is likely to be cost effective in the  
248 Canadian setting. Costs of care in the year of admission to ICU are expected to be reduced,  
249 though over a 20-year time period would increase due to longer patient life expectancy.

### 250 **Data-sharing statement**

251 Data relating to results presented will be made available on reasonable request.

### 252 **Contributions**

253 RS and KB contributed substantially to conception and design, acquisition of data, and  
254 analysis and interpretation of data. JD contributed substantially to acquisition, analysis, and  
255 interpretation of data. RS and JD drafted the manuscript, KB revised it critically for important  
256 intellectual content. RS, JD, and KB all gave final approval of the version to be published and  
257 agreed to act as guarantor of the work.

### 258 **List of abbreviations**

259 AE, adverse event; CAD, Canadian dollar; COVID-19, coronavirus disease 2019; CrI,  
260 credible interval; GW, general ward; ICU, intensive care unit; MD, mean difference; MV,  
261 mechanical ventilation; OR, odds ratio; PAV+, proportional-assist ventilation with load  
262 adjustable gain factors; PSV, pressure support ventilation; QALY, quality-adjusted life year;  
263 QoL, quality of life; SBT, spontaneous breathing trial; VAP, ventilator-associated  
264 pneumonia; WTP, willingness-to-pay.

### 266 **References**

- 267 1. Canadian Institute for Health Information. *Care in Canadian ICUs.*; 2016.  
268 [https://secure.cihi.ca/free\\_products/ICU\\_Report\\_EN.pdf](https://secure.cihi.ca/free_products/ICU_Report_EN.pdf).
- 269 2. Hill AD, Fowler RA, Burns KEA, Rose L, Pinto RL, Scales DC. Long-Term  
270 Outcomes and Health Care Utilization after Prolonged Mechanical Ventilation. *Ann*

- 1  
2  
3 271 *Am Thorac Soc.* 2017;14(3):355-362. doi:10.1513/AnnalsATS.201610-792OC  
4
- 5 272 3. Alhazzani W, Møller MH, Arabi YM, et al. Surviving Sepsis Campaign: guidelines on  
6 273 the management of critically ill adults with Coronavirus Disease 2019 (COVID-19).  
7 274 *Intensive Care Med.* 2020;46(5):854-887. doi:10.1007/s00134-020-06022-5  
8
- 9 275 4. Wunsch H. Mechanical Ventilation in COVID-19: Interpreting the Current  
10 276 Epidemiology. *Am J Respir Crit Care Med.* 2020;202(1):1-4.  
11 277 doi:10.1164/rccm.202004-1385ED
- 12  
13 278 5. Critical Care Services Ontario. Long-Term Mechanical Ventilation: Toolkit for Adult  
14 279 Acute Care Providers. 2013;(November).  
15 280 [https://www.criticalcareontario.ca/EN/Toolbox/Toolkits/Long-Term Mechanical](https://www.criticalcareontario.ca/EN/Toolbox/Toolkits/Long-Term-Mechanical-Ventilation-Toolkit-for-Adult-Acute-Care-Providers.pdf)  
16 281 [Ventilation Toolkit for Adult Acute Care Providers.pdf.](https://www.criticalcareontario.ca/EN/Toolbox/Toolkits/Long-Term-Mechanical-Ventilation-Toolkit-for-Adult-Acute-Care-Providers.pdf)
- 17  
18 282 6. Barrett K, Khan YA, Mac S, Ximenes R, Naimark DMJ, Sander B. Estimation of  
19 283 COVID-19-induced depletion of hospital resources in Ontario, Canada. *CMAJ.*  
20 284 2020;192(24):E640-E646. doi:10.1503/cmaj.200715
- 21  
22 285 7. Wiseman SM, Crump RT, Sutherland JM. Surgical wait list management in Canada  
23 286 during a pandemic: many challenges ahead. *Can J Surg.* 2020;63(3):E226-E228.  
24 287 doi:10.1503/cjs.006620
- 25  
26 288 8. Goligher EC, Dres M, Fan E, et al. Mechanical ventilation-induced diaphragm atrophy  
27 289 strongly impacts clinical outcomes. *Am J Respir Crit Care Med.* 2018;197(2):204-213.  
28 290 doi:10.1164/rccm.201703-0536OC
- 29  
30 291 9. Brochard L, Telias I. Bedside Detection of Overassistance During Pressure Support  
31 292 Ventilation. *Crit Care Med.* 2018;46(3):488-490.  
32 293 doi:10.1097/CCM.0000000000002913
- 33  
34 294 10. Epstein SK. How often does patient-ventilator asynchrony occur and what are the  
35 295 consequences? *Respir Care.* 2011;56(1):25-38.  
36 296 [http://eutils.ncbi.nlm.nih.gov/entrez/eutils/elink.fcgi?dbfrom=pubmed&id=21235836&](http://eutils.ncbi.nlm.nih.gov/entrez/eutils/elink.fcgi?dbfrom=pubmed&id=21235836&retmode=ref&cmd=prlinks)  
37 297 [retmode=ref&cmd=prlinks.](http://eutils.ncbi.nlm.nih.gov/entrez/eutils/elink.fcgi?dbfrom=pubmed&id=21235836&retmode=ref&cmd=prlinks)
- 38  
39 298 11. Thille AW, Rodriguez P, Cabello B, Lellouche F, Brochard L. Patient-ventilator  
40 299 asynchrony during assisted mechanical ventilation. *Intensive Care Med.*  
41 300 2006;32(10):1515-1522. doi:10.1007/s00134-006-0301-8
- 42  
43 301 12. De Wit M, Miller KB, Green DA, Ostman HE, Gennings C, Epstein SK. Ineffective  
44 302 triggering predicts increased duration of mechanical ventilation\*. *Crit Care Med.*  
45 303 2009;37(10):2740-2745. doi:10.1097/CCM.0b013e3181a98a05
- 46  
47 304 13. Blanch L, Villagra A, Sales B, et al. Asynchronies during mechanical ventilation are  
48 305 associated with mortality. *Intensive Care Med.* 2015;41(4):633-641.  
49 306 doi:10.1007/s00134-015-3692-6
- 50  
51 307 14. Schmidt M, Kindler F, Cecchini J, et al. Neurally adjusted ventilatory assist and  
52 308 proportional assist ventilation both improve patient-ventilator interaction. *Crit Care.*  
53 309 2015;19(1):56. doi:10.1186/s13054-015-0763-6
- 54  
55 310 15. Ranieri VM, Grasso S, Mascia L, et al. Effects of proportional assist ventilation on  
56 311 inspiratory muscle effort in patients with chronic obstructive pulmonary disease and



- 1  
2  
3 312 acute respiratory failure. *Anesthesiology*. 1997;86(1):79-91. doi:10.1097/00000542-  
4 313 199701000-00012  
5  
6 314 16. Wysocki M, Meshaka P, Richard J-C, Similowski T. Proportional-assist ventilation  
7 315 compared with pressure-support ventilation during exercise in volunteers with external  
8 316 thoracic restriction. *Crit Care Med*. 2004;32(2):409-414.  
9 317 doi:10.1097/01.CCM.0000108869.12426.51  
10  
11 318 17. Younes M. Proportional Assist Ventilation, a New Approach to Ventilatory Support:  
12 319 Theory. *Am Rev Respir Dis*. 1992;145(1):114-120. doi:10.1164/ajrccm/145.1.114  
13  
14 320 18. Bosma KJ, Read BA, Bahrgard Nikoo MJ, Jones PM, Priestap FA, Lewis JF. A Pilot  
15 321 Randomized Trial Comparing Weaning From Mechanical Ventilation on Pressure  
16 322 Support Versus Proportional Assist Ventilation. *Crit Care Med*. 2016;44(2):1-11.  
17 323 doi:10.1097/CCM.0000000000001600  
18  
19 324 19. Botha J, Green C, Carney I, Haji K, Gupta S, Tiruvoipati R. Proportional assist  
20 325 ventilation versus pressure support ventilation in weaning ventilation: a pilot  
21 326 randomised controlled trial. *Crit Care Resusc*. 2018;20(1):33-40.  
22 327 <http://www.ncbi.nlm.nih.gov/pubmed/29458319>. Accessed June 5, 2019.  
23  
24 328 20. Elganady AA, Beshey BN, Abdelaziz AAH. Proportional assist ventilation versus  
25 329 pressure support ventilation in the weaning of patients with acute exacerbation of  
26 330 chronic obstructive pulmonary disease. *Egypt J Chest Dis Tuberc*. 2014;63(3):643-  
27 331 650. doi:10.1016/j.ejcdt.2014.04.001  
28  
29 332 21. Saunders R, Geogopoulos D. Evaluating the Cost-Effectiveness of Proportional-Assist  
30 333 Ventilation Plus vs . Pressure Support Ventilation in the Intensive Care Unit in Two  
31 334 Countries. *Front public Heal*. 2018;6(June):1-8. doi:10.3389/fpubh.2018.00168  
32  
33 335 22. Xirouchaki N, Kondili E, Vaporidi K, et al. Proportional assist ventilation with load-  
34 336 adjustable gain factors in critically ill patients: Comparison with pressure support.  
35 337 *Intensive Care Med*. 2008;34(11):2026-2034. doi:10.1007/s00134-008-1209-2  
36  
37 338 23. Canadian Agency for Drugs and Technologies in Health. Guidelines for the Economic  
38 339 Evaluation of Health Technologies: Canada. 2017;(March):1-76.  
39 340 [https://www.cadth.ca/sites/default/files/pdf/guidelines\\_for\\_the\\_economic\\_evaluation\\_](https://www.cadth.ca/sites/default/files/pdf/guidelines_for_the_economic_evaluation_of_health_technologies_canada_4th_ed.pdf)  
40 341 [of\\_health\\_technologies\\_canada\\_4th\\_ed.pdf](https://www.cadth.ca/sites/default/files/pdf/guidelines_for_the_economic_evaluation_of_health_technologies_canada_4th_ed.pdf).  
41  
42 342 24. Cape J, Beca JM, Hoch JS, Ontario CC. Health policy and economics introduction to  
43 343 cost-effectiveness analysis for clinicians. *Univ Toronto Med J*. 2013;90(3):103-105.  
44  
45 344 25. Sasikumar S, Shanbhag V, Shenoy A, Unnikirshanan R. Comparison of pressure  
46 345 support and proportional assist ventilation plus for weaning from mechanical  
47 346 ventilation in critically ill patients. *Indian J Crit Care Med*. 2013;17(May 2016):34.  
48 347 [http://www.embase.com/search/results?subaction=viewrecord&from=export&id=L712](http://www.embase.com/search/results?subaction=viewrecord&from=export&id=L71239402%5Cnhttp://rd8hp6du2b.search.serialssolutions.com?sid=EMBASE&issn=09725229&id=doi:&atitle=Comparison+of+pressure+support+and+proportional+assist+ve)  
49 348 [39402%5Cnhttp://rd8hp6du2b.search.serialssolutions.com?sid=EMBASE&issn=0972](http://www.embase.com/search/results?subaction=viewrecord&from=export&id=L71239402%5Cnhttp://rd8hp6du2b.search.serialssolutions.com?sid=EMBASE&issn=09725229&id=doi:&atitle=Comparison+of+pressure+support+and+proportional+assist+ve)  
50 349 [5229&id=doi:&atitle=Comparison+of+pressure+support+and+proportional+assist+ve](http://www.embase.com/search/results?subaction=viewrecord&from=export&id=L71239402%5Cnhttp://rd8hp6du2b.search.serialssolutions.com?sid=EMBASE&issn=09725229&id=doi:&atitle=Comparison+of+pressure+support+and+proportional+assist+ve)  
51 350 [ntilation+plus+for+weaning](http://www.embase.com/search/results?subaction=viewrecord&from=export&id=L71239402%5Cnhttp://rd8hp6du2b.search.serialssolutions.com?sid=EMBASE&issn=09725229&id=doi:&atitle=Comparison+of+pressure+support+and+proportional+assist+ve).  
52  
53 351 26. Aguirre-Bermeo H, Bottiroli M, Italiano S, et al. Ventilación con presión de soporte y  
54 352 ventilación proporcional asistida durante la retirada de la ventilación mecánica. *Med*  
55 353 *Intensiva*. 2014;38(6):363-370. doi:10.1016/j.medin.2013.08.003  
56  
57  
58  
59  
60

- 1  
2  
3 354 27. Teixeira SN, Osaku EF, Lima de Macedo Costa CR, et al. Comparison of Proportional  
4 355 Assist Ventilation Plus, T-Tube Ventilation, and Pressure Support Ventilation as  
5 356 Spontaneous Breathing Trials for Extubation: A Randomized Study. *Respir Care*.  
6 357 2015;60(11):1527-1535. doi:10.4187/respcare.03915
- 8 358 28. Tirupakuzhi Vijayaraghavan BK, Hamed S, Jain A, et al. Evidence Supporting Clinical  
9 359 Use of Proportional Assist Ventilation: A Systematic Review and Meta-Analysis of  
10 360 Clinical Trials. *J Intensive Care Med*. January 2018:885066618769021.  
11 361 doi:10.1177/0885066618769021
- 13 362 29. Care I, Kataoka J, Kuriyama A, Norisue Y, Fujitani S. Proportional modes versus  
14 363 pressure support ventilation : a systematic review and meta - analysis. *Ann Intensive*  
15 364 *Care*. 2018. doi:10.1186/s13613-018-0470-y
- 17 365 30. Arabi YM, Alhashemi J, Tamim H, et al. The impact of time to tracheostomy on  
18 366 mechanical ventilation duration, length of stay, and mortality in intensive care unit  
19 367 patients. *J Crit Care*. 2009;24(3):435-440. doi:10.1016/j.jcrc.2008.07.001
- 21 368 31. Wan X, Wang W, Liu J, Tong T. Estimating the sample mean and standard deviation  
22 369 from the sample size, median, range and/or interquartile range. *BMC Med Res*  
23 370 *Methodol*. 2014;14:135. doi:10.1186/1471-2288-14-135
- 25 371 32. Hozo SP, Djulbegovic B, Hozo I. Estimating the mean and variance from the median ,  
26 372 range , and the size of a sample. 2005;10:1-10. doi:10.1186/1471-2288-5-13
- 28 373 33. KJ B, BA R, MJ BN, PM J, FA P. A Pilot Randomized Trial Comparing Weaning  
29 374 From Mechanical Ventilation on Pressure Support Versus Proportional Assist  
30 375 Ventilation. *Crit Care Med*. 2016;44(6):1098-1108.  
31 376 doi:10.1097/CCM.0000000000001600
- 33 377 34. Vaporidi K, Babalis D, Chytas A, et al. Clusters of ineffective efforts during  
34 378 mechanical ventilation: impact on outcome: Supplementary material. *Intensive Care*  
35 379 *Medicine*. 2016:1-8.
- 37 380 35. Sinuff T, Muscedere J, Cook DJ, et al. Implementation of clinical practice guidelines  
38 381 for ventilator-associated pneumonia: A multicenter prospective study. *Crit Care Med*.  
39 382 2013;41(1):15-23. doi:10.1097/CCM.0b013e318265e874
- 41 383 36. Miltiades AN, Gershengorn HB, Hua M, Kramer AA, Li G, Wunsch H. Cumulative  
42 384 Probability and Time to Reintubation in U.S. ICUs. *Crit Care Med*. 2017;45(5):835-  
43 385 842. doi:10.1097/CCM.0000000000002327
- 45 386 37. Bouadma L, Sonnevile R, Garrouste-Orgeas M, et al. Ventilator-Associated Events:  
46 387 Prevalence, Outcome, and Relationship With Ventilator-Associated Pneumonia. *Crit*  
47 388 *Care Med*. 2015;43(9):1798-1806. doi:10.1097/CCM.0000000000001091
- 49 389 38. Brinkman S, de Jonge E, Abu-Hanna A, Arbous MS, de Lange DW, de Keizer NF.  
50 390 Mortality after hospital discharge in ICU patients. *Crit Care Med*. 2013;41(5):1229-  
51 391 1236. doi:10.1097/CCM.0b013e31827ca4e1
- 53 392 39. Evans J, Kobewka D, Thavorn K, D'Egidio G, Rosenberg E, Kyeremanteng K. The  
54 393 impact of reducing intensive care unit length of stay on hospital costs: evidence from a  
55 394 tertiary care hospital in Canada. *Can J Anesth*. 2018;65(6):627-635.  
56 395 doi:10.1007/s12630-018-1087-1
- 57  
58  
59  
60

- 1  
2  
3 396 40. Lachaine J, Beauchemin C. Economic evaluation of dexmedetomidine relative to  
4 397 midazolam for sedation in the intensive care unit. *Can J Hosp Pharm.* 2012;65(2):103-  
5 398 110. doi:10.4212/cjhp.v65i2.1116  
6  
7 399 41. Liu CC, Rudmik L. A Cost-effectiveness Analysis of Early vs Late Tracheostomy.  
8 400 *JAMA Otolaryngol Neck Surg.* 2016;142(10):981. doi:10.1001/jamaoto.2016.1829  
9  
10 401 42. Lee SJ. Cost-Utility Analysis of Oral Antiseptic Chlorhexidine in decreasing  
11 402 Ventilator-Associated Pneumonia in Intensive Care Units. 2016.  
12  
13 403 43. Muscedere JG, Day A, Heyland DK. Mortality, Attributable Mortality, and Clinical  
14 404 Events as End Points for Clinical Trials of Ventilator-Associated Pneumonia and  
15 405 Hospital-Acquired Pneumonia. *Clin Infect Dis.* 2010;51(S1):S120-S125.  
16 406 doi:10.1086/653060  
17  
18 407 44. Cooper K, Frampton G, Harris P, et al. Are educational interventions to prevent  
19 408 catheter-related bloodstream infections in intensive care unit cost-effective? *J Hosp*  
20 409 *Infect.* 2014;86(1):47-52. doi:10.1016/j.jhin.2013.09.004  
21  
22 410  
23  
24 411

Confidential

## Tables

Table 1 Model parameters

| Grouping                                     | Parameter                                         | Base case <sup>reference</sup>                                                                                                                        |
|----------------------------------------------|---------------------------------------------------|-------------------------------------------------------------------------------------------------------------------------------------------------------|
| Patient cohort demographics                  | Age, mean years (SD)                              | 67 (12) <sup>33</sup>                                                                                                                                 |
|                                              | Gender, % female (SE)                             | 39.7 (0.13) <sup>2</sup>                                                                                                                              |
| Reference efficacy<br>Standard of care (PSV) | Asynchrony >10% at MV initiation, % (range)       | 4.2% (0.7, 14.1) <sup>34</sup>                                                                                                                        |
|                                              | Time on MV, mean days (95% CI)                    | 8.1 (4.5, 28.3) <sup>35</sup>                                                                                                                         |
|                                              | Time in ICU, mean days (95% CI)                   | 12.6 (7.4, 33.3) <sup>35</sup>                                                                                                                        |
|                                              | Time in hospital, mean days (95% CI)              | 43.5 (18.6, 68.4) <sup>35</sup>                                                                                                                       |
|                                              | Spontaneous breathing trial success, % (95% CI)   | 77.9 (73.8, 82.1) <sup>22</sup>                                                                                                                       |
|                                              | Liberation success, % (95% CI)                    | 85.3 (85.1, 85.6) <sup>36</sup>                                                                                                                       |
| AE rates                                     | Tracheostomy, % (95% CI)                          | 26 (8.1, 44.0) <sup>33</sup>                                                                                                                          |
|                                              | VAP, % (95% CI)                                   | 8.8 (5.7, 11.9) <sup>35</sup>                                                                                                                         |
|                                              | Nosocomial infection, % (95% CI)                  | 0.85 (0.66, 1.04) <sup>37</sup>                                                                                                                       |
|                                              | ICU mortality (95% CI)                            | 25.4 (20.7, 30.1) <sup>35</sup>                                                                                                                       |
|                                              | Hospital mortality (95% CI)                       | 30.3 (25.3, 35.3) <sup>35</sup>                                                                                                                       |
|                                              | Post-discharge mortality, % (95% CI)              | Year 1: 12.5 (12.4, 12.6) <sup>38</sup><br>Year 2: 19.3 (19.2, 19.5) <sup>38</sup><br>Year 3: 27.5 (27.3, 27.7) <sup>38</sup><br>Year 4+: life tables |
| Comparative effectiveness<br>PAV+ vs. PSV    | Total time MV, mean days (95% CI)                 | -1.53 (-2.24, -0.83) <sup>†</sup>                                                                                                                     |
|                                              | ICU length of stay, mean days (95% CI)            | -1.54 (-2.19, -0.90) <sup>†</sup>                                                                                                                     |
|                                              | Hospital length of stay, mean days (95% CI)       | -1.83 (-2.51, -1.16) <sup>†</sup>                                                                                                                     |
|                                              | Successful weaning/liberation, OR (95% CI)        | 1.49 (0.59, 3.79) <sup>†</sup>                                                                                                                        |
|                                              | ICU mortality, OR (95% CI)                        | 0.70 (0.41, 1.20) <sup>†</sup>                                                                                                                        |
|                                              | Hospital mortality, OR (95% CI)                   | 0.70 (0.40, 1.22) <sup>†</sup>                                                                                                                        |
|                                              | Tracheostomy, OR (95% CI)                         | 0.76 (0.44, 1.31) <sup>†</sup>                                                                                                                        |
|                                              | Extubation failure/re-intubation, OR (95% CI)     | 0.52 (0.25, 1.08) <sup>†</sup>                                                                                                                        |
| Asynchrony index $\geq 10$ (95% CI)          | 0.13 (0.07, 0.23) <sup>†</sup>                    |                                                                                                                                                       |
| Costs                                        | ICU, \$ per day (95% CI)                          | 2,765 (2,354, 3,690) <sup>39</sup>                                                                                                                    |
|                                              | GW, \$ per day (95% CI)                           | 1,019 (717, 1,400) <sup>39</sup>                                                                                                                      |
|                                              | MV initiation, \$ per event (95% CI)              | 139 (125, 153) <sup>40</sup>                                                                                                                          |
|                                              | MV maintenance, \$ per day (95% CI)               | 851 (766, 936) <sup>40</sup>                                                                                                                          |
|                                              | Tracheostomy, \$ per event (95% CI)               | 4,193 (3,908, 4,477) <sup>41</sup>                                                                                                                    |
|                                              | VAP, \$ per day (95% CI)                          | 58 (30, 73) <sup>42,43</sup>                                                                                                                          |
|                                              | VAP, additional length of stay (95% CI)           | 9.5 (8.8, 10.1) <sup>‡</sup>                                                                                                                          |
|                                              | Other nosocomial infection, \$ per event (95% CI) | 870 (783, 956) <sup>44</sup>                                                                                                                          |
|                                              | PSV, \$ purchase cost                             | 0 (assumption)                                                                                                                                        |
| PAV+, \$ one-off purchase cost               | 27,000 <sup>*</sup>                               |                                                                                                                                                       |

| Grouping             | Parameter                               | Base case reference                  |
|----------------------|-----------------------------------------|--------------------------------------|
|                      | Post-discharge, \$ annual cost (95% CI) | 13,707 (6,241, 37,631) <sup>2</sup>  |
| Health state utility | Baseline (95% CI)                       | 0.776 (0.677, 0.899) <sup>21</sup>   |
|                      | Annual disutility (95% CI)              | 0.003 (0.003, 0.004) <sup>21</sup>   |
|                      | MV (95% CI)                             | -0.390 (-0.590, 0.090) <sup>21</sup> |
|                      | ICU (95% CI)                            | 0.402 (0.362, 0.442) <sup>21</sup>   |
|                      | Hospital (95% CI)                       | 0.520 (0.450, 0.590) <sup>21</sup>   |
|                      | Post-discharge to 1 year (95% CI)       | 0.550 (0.480, 0.610) <sup>21</sup>   |

<sup>†</sup>Present study, determined from meta-analysis (see Appendix). <sup>‡</sup>Canadian MIS Database, F2010/11 - F2014/15. <sup>‡</sup> Personal communication from Medtronic. Probabilistic model inputs (used for the PSA) were based on input variance, calculated from reported confidence intervals. AE, adverse event; CI, confidence interval; GW, general ward; ICU, intensive care unit; MV, mechanical ventilation; OR, odds ratio; PAV+, proportional-assist ventilation with adjustable gain parameters; PSV, pressure support ventilation; SD, standard deviation; SE, standard error; VAP, ventilator-associated pneumonia.

**Table 2** Base case cost and quality-adjusted life year outcomes

| Time horizon | Mode/result | Costs     | QALY  | ICER     |
|--------------|-------------|-----------|-------|----------|
| 1 year       | PAV+        | \$53,898  | 0.29  |          |
|              | PSV         | \$60,271  | 0.25  |          |
|              | Difference  | -\$6,373  | +0.04 | Dominant |
| 20 years     | PAV+        | \$144,041 | 6.79  |          |
|              | PSV         | \$137,976 | 5.86  |          |
|              | Difference  | \$6,065   | +0.92 | \$6,592  |

Results for the base case analysis with total costs and total QALYs, the difference (PAV+ minus PSV), and the associated ICER. In the 1-year time horizon, where PAV+ was associated with savings for the QALYs gained, the ICER is considered dominant as there is no additional cost associated with a QALY gain.

ICER, incremental cost-effectiveness ratio; PAV+, proportional-assist ventilation with adjustable gain parameters; PSV, pressure support ventilation; QALY, quality-adjusted life year.

**Table 3** Scenario analyses

| Scenario                                                           | 1 year            |          | 20 years          |         |
|--------------------------------------------------------------------|-------------------|----------|-------------------|---------|
|                                                                    | Difference        | ICER     | Difference        | ICER    |
| Base case (default values)                                         | -\$6,373<br>+0.04 | Dominant | \$6,065<br>0.92   | \$6,592 |
| Only significant differences in comparative effectiveness included | -\$6,767<br>+0.02 | Dominant | +\$425<br>+0.53   | \$802   |
| Younger population (50 years)                                      | -\$6,373<br>+0.04 | Dominant | +\$8,281<br>+1.08 | \$7,668 |
| Population 70% female                                              | -\$6,373<br>+0.04 | Dominant | +\$6,345<br>+0.94 | \$6,750 |
| No difference in asynchrony between PAV+ mode and PSV              | -\$5,477<br>+0.03 | Dominant | +\$6,319<br>+0.87 | \$7,263 |
| PSV also has a purchase cost (\$27,000)                            | -\$6,550<br>+0.04 | Dominant | +\$5,888<br>+0.92 | \$6,400 |



|                                                                                         |                   |             |                   |          |
|-----------------------------------------------------------------------------------------|-------------------|-------------|-------------------|----------|
| <b>Per day hospital costs taken from CIHI data.<sup>1</sup> ICU \$3,592; GW \$1,135</b> | -\$8,138<br>+0.04 | Dominant    | +\$4,320<br>+0.92 | \$4,696  |
| <b>Canadian efficacy data only<sup>33</sup></b>                                         | -\$8,268<br>0.0   | Cost saving | -\$5,857<br>+0.17 | Dominant |

Results are presented as PAV+ versus standard care PSV with difference in costs over difference in QALYs. The associated ICER is shown; in cases where costs decrease and QALYs increase, the ICER is taken as dominant. Care in Canadian ICU: Data Tables, Table 13 Average daily cost for stay in ICU and GW by hospital type, 2013–2014. [https://www.cihi.ca/sites/default/files/document/icu\\_datatables\\_en.xlsx](https://www.cihi.ca/sites/default/files/document/icu_datatables_en.xlsx)

CIHI, Canadian Institute for Health Information; GW, general ward; ICER, incremental cost-effectiveness ratio; ICU, intensive care unit; PAV+, proportional-assist ventilation with adjustable gain parameters; PSV, pressure support ventilation.

Confidential

1  
2  
3 **Figures and captions**

4 **Figure 1** Model structure

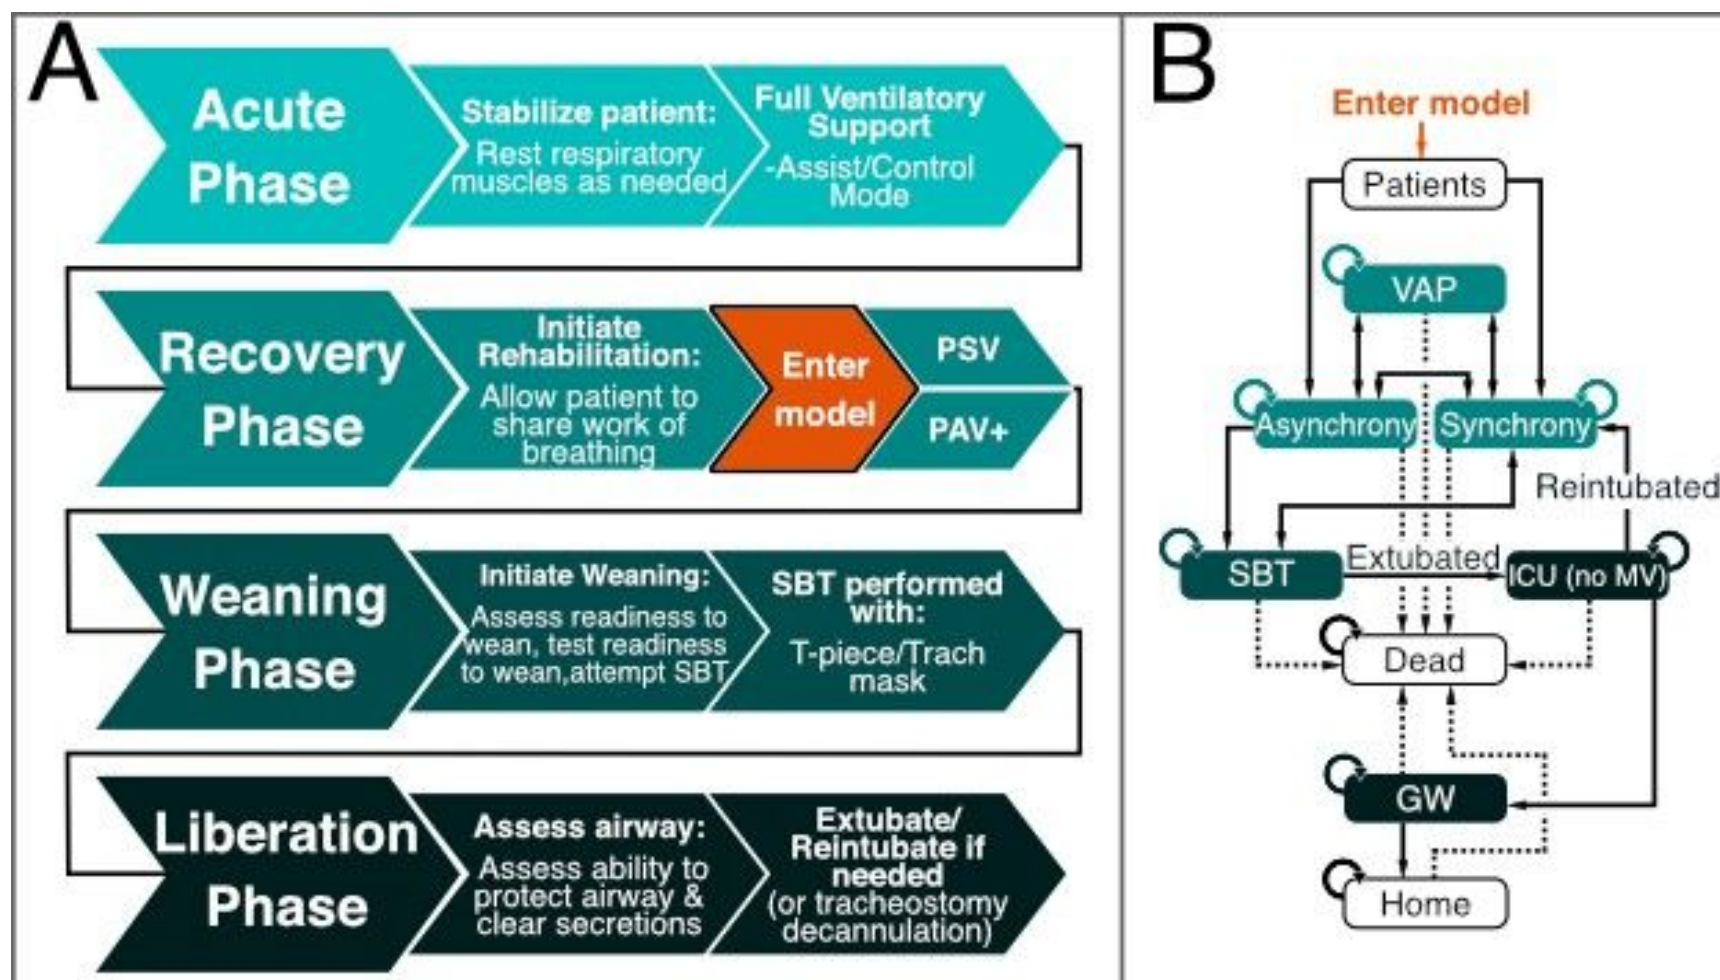

38  
39 The clinical stages of MV are shown in A. The model begins once the patient is out of the acute phase and enters the Recovery phase. The model is shown in B. Patients on MV are either synchronous or asynchronous with the ventilator. Synchronous patients can become asynchronous and vice versa. Patients on MV are at risk of ventilator-associated pneumonia. From MV, patients undergo a spontaneous breathing trial, which if successful results in liberation (extubation and removal from invasive MV). After successful liberation, the patient is transferred to lower-acuity care (GW) and later discharged home. If there is patient compromise after extubation (extubation failure) the patient will be reintubated and placed back on MV. At any stage patients may die.

40  
41  
42  
43  
44  
45 GW, general ward; MV, mechanical ventilation; PAV+, proportional-assist ventilation with adjustable gain parameters; PSV, pressure support ventilation; SBT, spontaneous breathing trial; VAP, ventilator-associated pneumonia.

Figure 2 Cost-effectiveness plane at two time horizons for PAV+ mode versus PSV

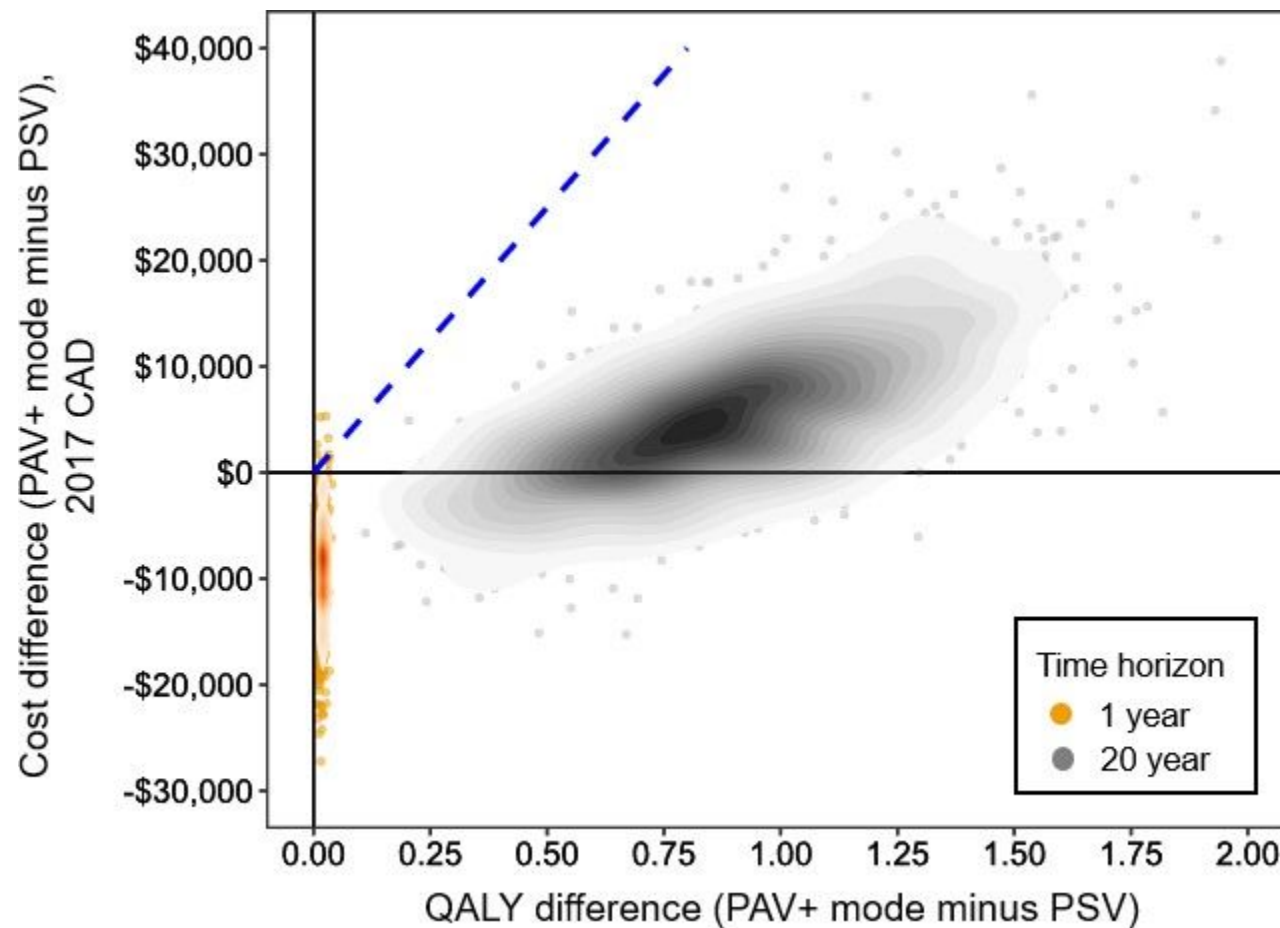

A sensitivity analysis of 2,000 replicates was performed for cost-effectiveness time horizons of 1 year and 20 years. The blue reference line indicates a willingness-to-pay threshold of \$50,000 per QALY gained. Points underneath this line are considered cost-effective. Simulations in the lower right quadrant (increase in QALY, decrease in cost) are considered dominant. Density of individual probabilistic simulation results for each time horizon is represented by highlighted areas of the cost-effectiveness plane.

CAD, Canadian dollar; PAV+, proportional-assist ventilation with adjustable gain parameters; PSV, pressure support ventilation; QALY, quality-adjusted life year.

Figure 3 Cost-effectiveness acceptability curve at two time horizons for PAV+ mode versus PSV

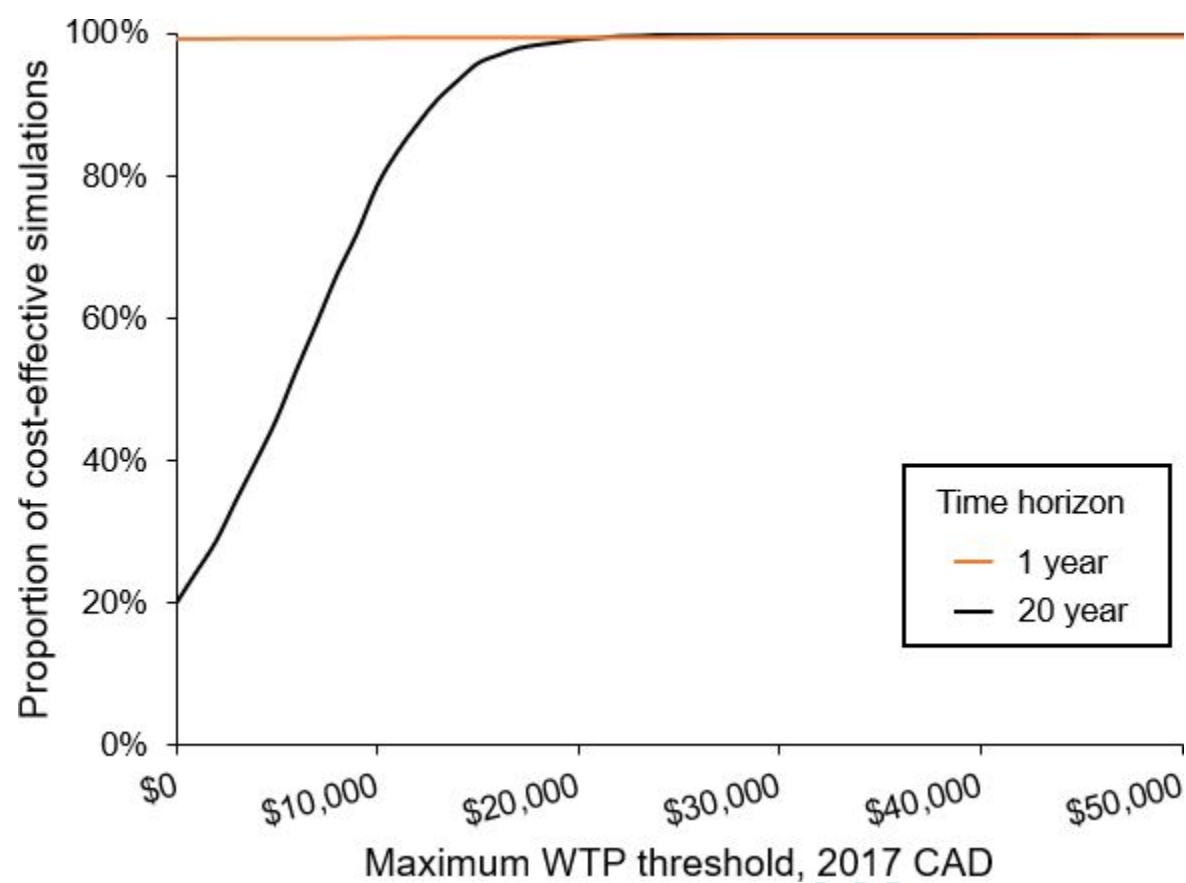

The proportion of simulations is shown according to varying thresholds of cost effectiveness. Cases where the result was dominant (a decrease in costs accompanied by an increase in QALY) are counted among the cost-effective scenarios, hence the curves' indicating non-zero proportions of simulations as cost-effective even at a willingness to pay threshold of \$0.

PAV+, proportional-assist ventilation with adjustable gain parameters; CAD, Canadian dollar; PSV, pressure support ventilation; QALY, quality-adjusted life year; WTP, willingness to pay (threshold).

1  
2  
3 **Appendix - The clinical and cost effectiveness of PAV+ mode for mechanical ventilation**  
4  
5  
6

7 **Short-title:** PAV+ for mechanical ventilation in the ICU  
8  
9

10  
11 **Rhodri Saunders (DPhil)**

12 Coreva Scientific GmbH & Co KG

13 Im Muehlenbruch 1, 3rd Floor

14 53639 Koenigswinter, Germany

15 rhodri@coreva-scientific.com  
16

17  
18 **Jason Davis (DPhil)**

19 Coreva Scientific GmbH & Co KG

20 Im Muehlenbruch 1, 3rd Floor

21 53639 Koenigswinter, Germany

22 jason@coreva-scientific.com  
23

24  
25 **Karen J. Bosma (PhD, corresponding author)**

26 Associate Professor of Medicine, University of Western Ontario

27 Consulting Critical Care Physician, London Health Sciences Centre

28 University Hospital

29 339 Windermere Road, B2-194d

30 London, ON, Canada N6A 5A5

31 karenj.bosma@lhsc.on.ca  
32  
33  
34  
35  
36  
37  
38  
39  
40  
41  
42  
43  
44  
45  
46  
47  
48  
49  
50  
51  
52  
53  
54  
55  
56  
57  
58  
59  
60



## Appendix

### Identifying relevant literature

The aim of the literature searches was to supplement data identified from the original model publication,<sup>1</sup> by identifying recent literature reporting on efficacy, safety, and costs associated with MV in Canada. In combining data from the previous study with that from the Canadian setting, the aim was to provide a holistic view of data on PAV+ mode. As the focus of the publication is an economic model, the intent of the searches was to obtain a representative assessment of additional data available on outcomes in the Canadian setting, thus they were performed pragmatically rather than systematically.

To inform the model design and data analysis, a structured literature search of PubMed was performed using search terms detailed in **Table 1**. These were supplemented by hand searches of Google Scholar to identify relevant, non-PubMed-indexed clinical studies. The supplementary materials of included studies were also reviewed for relevant data.

**Table 1** Structures searched in PubMed to identify relevant cost data

| # | Aim              | Search string                                                                                                                                                                                                                                                                                                                                                                                                                                                                                                                                                                                                                                                                                                                                                                                                                                                                                                                                                                                                                                                                                                                                                                                                                                                                                                            | Hits      |
|---|------------------|--------------------------------------------------------------------------------------------------------------------------------------------------------------------------------------------------------------------------------------------------------------------------------------------------------------------------------------------------------------------------------------------------------------------------------------------------------------------------------------------------------------------------------------------------------------------------------------------------------------------------------------------------------------------------------------------------------------------------------------------------------------------------------------------------------------------------------------------------------------------------------------------------------------------------------------------------------------------------------------------------------------------------------------------------------------------------------------------------------------------------------------------------------------------------------------------------------------------------------------------------------------------------------------------------------------------------|-----------|
| 1 | Country specific | canada[ad] OR "Canada"[tw] OR "Canadian"[tw] OR "Canadians"[tw] OR "Canada"[Mesh] OR "Alberta"[tw] OR "British Columbia"[tw] OR "Manitoba"[tw] OR "New Brunswick"[tw] OR "Newfoundland and Labrador"[tw] OR "Northwest Territories"[tw] OR "Nova Scotia"[tw] OR "Nunavut"[tw] OR "Ontario"[tw] OR "Prince Edward Island"[tw] OR "Quebec"[tw] OR "Saskatchewan"[tw] OR "Yukon Territory"[tw] OR "Toronto"[tw] OR "Ottawa"[tw] OR "Winnipeg"[tw] OR "Regina"[tw] OR "Edmonton"[tw] OR "Vancouver"[tw] OR "Montreal"[tw] OR "Saint John"[tw] OR "Halifax"[tw] OR "St John's"[tw] OR "Charlottetown"[tw] OR "Alberta"[ad] OR "British Columbia"[ad] OR "Manitoba"[ad] OR "New Brunswick"[ad] OR "Newfoundland and Labrador"[ad] OR "Northwest Territories"[ad] OR "Nova Scotia"[ad] OR "Nunavut"[ad] OR "Ontario"[ad] OR "Prince Edward Island"[ad] OR "Quebec"[ad] OR "Saskatchewan"[ad] OR "Yukon Territory"[ad] OR "Toronto"[ad] OR "Ottawa"[ad] OR "Winnipeg"[ad] OR "Regina"[ad] OR "Edmonton"[ad] OR "Vancouver"[ad] OR "Montreal"[ad] OR "Saint John"[ad] OR "Halifax"[ad] OR "St John's"[ad] OR "Charlottetown"[ad] OR "CADTH"[tw]                                                                                                                                                                                   | 216,400   |
| 2 | All cost studies | "Costs and Cost Analysis"[Mesh] OR "Cost-Benefit Analysis"[Mesh] OR "Cost of Illness"[Mesh] OR "Health Care Costs"[Mesh] OR "Cost Sharing"[Mesh] OR "Cost Savings"[Mesh] OR "Technology, High-Cost"[Mesh] OR "Cost Control"[Mesh] OR "Cost Allocation"[Mesh] OR "Direct Service Costs"[Mesh] OR "Hospital Costs"[Mesh] OR "Employer Health Costs"[Mesh] OR "Drug Costs"[Mesh] OR "Health Expenditures"[Mesh] OR "Health Resources/economics"[Mesh] OR "Economics, Hospital"[Mesh] OR "Economics, Medical"[Mesh] OR "Economics, Pharmaceutical"[Mesh] OR "Economics, Nursing"[Mesh] OR "Managed Care Programs"[Mesh] OR "Insurance, Physician Services"[Mesh] OR "Budgets"[Mesh] OR "Economics"[Mesh] OR "Commerce"[Mesh] OR Cost[tw] OR economic[tw] OR "Length of Stay/economics"[Mesh] OR "Length of Stay/statistics and numerical data"[Mesh] OR "Financial Management, Hospital"[Mesh] OR "Hospital Charges/statistics and numerical data"[Mesh] OR "Hospital Costs"[Mesh] OR "Economics, Hospital"[Mesh] OR "LOS"[tiab] OR ((USD[tw] OR CAD[tw] OR dollar[tw] OR dollars[tw]) AND (Cost[tw] OR price[tw] OR expense[tw] OR burden[tw] OR "pricing"[tw] OR "prices"[tw])) OR (("Cost"[tw] OR spending[tw] OR "economic"[tiab] OR "Costs"[tw] OR "economics"[tiab]) AND ("Healthcare"[tiab] OR "health care"[tiab] or | 1,013,476 |

| # | Aim                                     | Search string                                                                                                                                                                                                                                                                                                                                                                                                                                                                                                                                                                                                                                                                                                                                 | Hits      |
|---|-----------------------------------------|-----------------------------------------------------------------------------------------------------------------------------------------------------------------------------------------------------------------------------------------------------------------------------------------------------------------------------------------------------------------------------------------------------------------------------------------------------------------------------------------------------------------------------------------------------------------------------------------------------------------------------------------------------------------------------------------------------------------------------------------------|-----------|
| 3 | Studies since 2012                      | "medical"[tiab] OR treatment[tiab] OR hospital[tiab] OR hospitalization[tw] OR hospitalisation[tw] OR "health service"[tiab]))<br>"2012/01/01"[PDAT]:"2018/05/01"[PDAT]                                                                                                                                                                                                                                                                                                                                                                                                                                                                                                                                                                       | 6,589,304 |
| 4 | Recent cost studies                     | #1 AND #2 AND #3                                                                                                                                                                                                                                                                                                                                                                                                                                                                                                                                                                                                                                                                                                                              | 6,942     |
| 5 | Adverse events (AE) of interest         | "Tracheotomy"[Mesh] OR "Tracheotomy"[tw] OR "Tracheostomy"[tw] OR "Pneumonia, Ventilator-Associated"[Mesh] OR VAP[tw] OR "ventilator-associated pneumonia"[tw] OR "Respiration, Artificial/adverse effects"[Mesh] OR "Respiration, Artificial/complications"[Mesh] OR "Respiration, Artificial/economics"[Mesh] OR "Respiration, Artificial/mortality"[Mesh] OR "Respiration, Artificial/statistics and numerical data"[Mesh] OR "Length of Stay/economics"[Mesh] OR synchrony[tw] OR synchronous[tw] OR asynchrony[tw] OR asynchronous[tw] OR ((LOS[tw] OR stay[tw]) AND (ICU[tw] OR "intensive care"[tw])) OR ((mortality[tw] OR death[tw] OR surviving[tw] OR survival[tw]) AND (ICU[tw] OR "intensive care"[tw] OR "critically ill"[tw])) | 160,942   |
| 6 | Those reporting on assisted ventilation | "Respiration, Artificial"[Mesh] OR "High-Frequency Ventilation"[Mesh] OR "Interactive Ventilatory Support"[Mesh] OR "mechanical ventilation"[tw] OR "assisted ventilation"[tw] OR "proportional assist"[tw] OR "proportional-assist"[tw] OR PAV[tw] OR "PAV+"[tw] OR NAVA[tw] OR PSV[tw] OR "neurally adjusted"[tw] OR "artificial respiration"[tw] OR "artificial ventilation"[tw]                                                                                                                                                                                                                                                                                                                                                           | 92,907    |
| 7 | AEs and assisted ventilation            | #5 AND #6                                                                                                                                                                                                                                                                                                                                                                                                                                                                                                                                                                                                                                                                                                                                     | 26,126    |
| 8 | Cost of assisted ventilation            | #4 AND #7                                                                                                                                                                                                                                                                                                                                                                                                                                                                                                                                                                                                                                                                                                                                     | 36        |

### Literature search results

Regarding clinical effectiveness outcomes, the literature review identified seven clinical studies comparing PAV+ mode with PSV.<sup>2-8</sup> Of these, four covered the recovery phase of critical care,<sup>2,3,5,7</sup> three the weaning phase,<sup>4,6,8</sup> two were Canadian,<sup>2,3</sup> and one was not randomized.<sup>7</sup> A total of 271 patients were managed with PAV+ mode and 253 with PSV. Clinical and safety data of interest from these studies were extracted and used for meta-analysis.

### Pragmatic meta-analysis

#### Methods

No individual study among those identified in the literature review presented robust clinical data on the required model inputs for the Canadian setting. In their absence, a pragmatic meta-analysis of results was conducted. Included studies were reviewed independently by both RS and KJB, with data extraction also performed independently by both authors. Where there was disagreement between included data, this was resolved by discussion. Unless already in the correct form for analysis, extracted data were converted to means and standard deviations according the method of Wan et al.<sup>9</sup> Data conversion (using R) and meta-analysis (using RevMan v5.3) were performed by JD and outcomes checked by RS and KJB. In the meta-analysis, a random-effects model was used to account for low powered studies and potential differences in clinical practice between countries. Dichotomous outcomes were calculated as odds ratios or as Peto odds ratios for rare outcomes or where numerous groups had zero events.

## Results

Data extraction resulted in sufficient data to assess all required endpoints for hospital time: total time on MV, ICU length of stay, and hospital length of stay. Total patient numbers were 524 for time on MV and in the ICU, and 253 for hospital length of stay. For each endpoint, heterogeneity was low ( $I^2 \leq 24\%$ ) and PAV+ mode was associated with a significant reduction in time in each care setting. Meta-analysis results for these endpoints are shown in Figure 1.

For dichotomous endpoints, six events had three or more studies reporting on the outcome: weaning success, extubation/liberation failure, need for tracheostomy, ICU mortality, hospital mortality, and asynchrony index  $\geq 10$ . For all outcomes, heterogeneity of reported data was low ( $I^2 \leq 16\%$ ). PAV+ mode was generally associated with improved outcomes, although not statistically significant (Figure 2), with the exception of asynchrony index  $\geq 10$ , where PAV+ mode was significantly associated with decreased odds of asynchrony (OR 0.13, 0.07-0.23). The meta-analysis results represent the base-case inputs for our health-economic analysis and are summarized in Table 2.

**Figure 1** Meta-analysis results for continuous outcomes

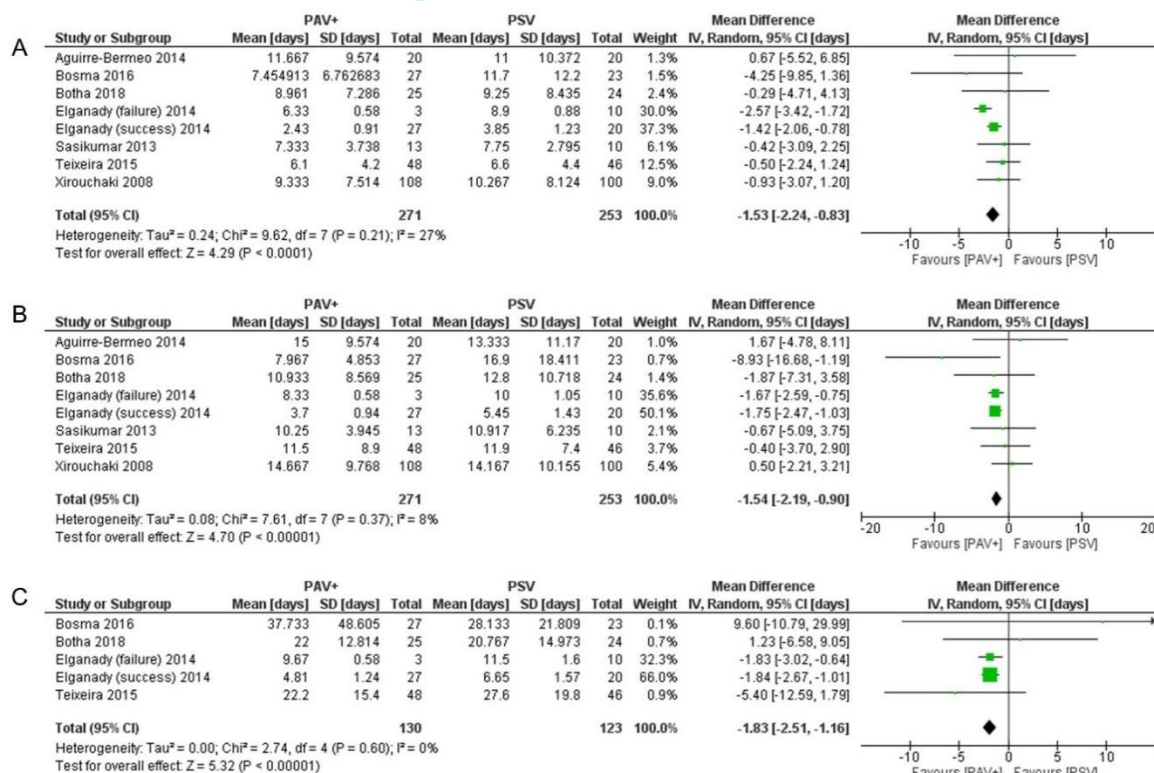

Results for time on MV (A), length of stay in the ICU (B) and length of stay in hospital (C) are shown. CI, confidence interval; IV, inverse variance; PAV+, proportional-assist ventilation with adjustable gain parameters; PSV, pressure support ventilation; SD, standard deviation.

**Figure 2** *Meta-analysis results for dichotomous outcomes*

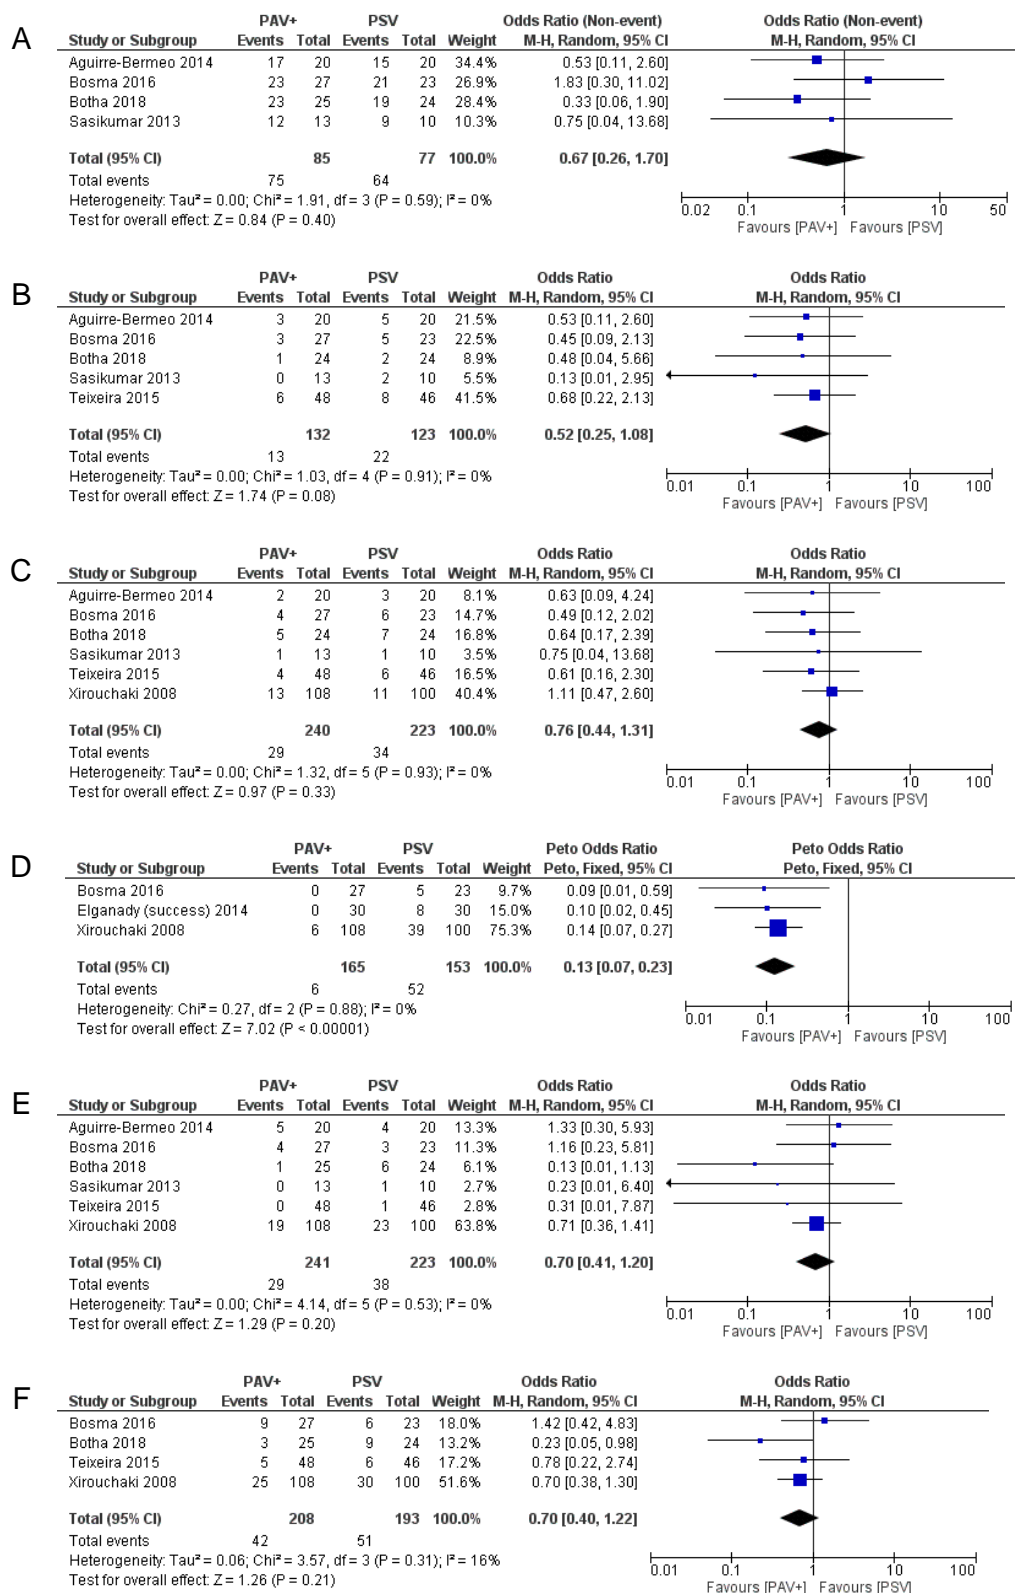

Results for weaning success (A), extubation/liberation failure (B), need for tracheostomy (C), asynchrony index  $\geq 10$  (D), ICU mortality (E) and overall hospital mortality (F) are shown. All are presented as odds ratios with random-effects models, except for odds of asynchrony index  $\geq 10$ , calculated as Peto odds ratios since 2 of 3 PAV+ had zero events.

CI, confidence interval; M-H, Mantel-Haenszel; PAV+, proportional-assist ventilation with adjustable gain parameters; PSV, pressure support ventilation; SD, standard deviation.

**Table 2** Meta-analysis summary results

| Outcome                          | PAV+        |       | PSV         |       |                      |
|----------------------------------|-------------|-------|-------------|-------|----------------------|
| Continuous                       | Mean (SD)   | N     | Mean (SD)   | N     | MD                   |
| Total time MV (days)             | 5.33 (0.96) | 271   | 6.87 (1.08) | 253   | -1.53 [-2.24, -0.83] |
| ICU length of stay (days)        | 6.61 (0.83) | 271   | 8.16 (1.05) | 253   | -1.54 [-2.19, -0.90] |
| Hospital length of stay (days)   | 6.69 (0.86) | 130   | 8.53 (1.18) | 123   | -1.83 [-2.51, -1.16] |
| Dichotomous                      | Events      | Total | Events      | Total | OR                   |
| Successful weaning/liberation    | 75          | 85    | 64          | 77    | 1.49 [0.59, 3.79]    |
| ICU mortality                    | 29          | 241   | 38          | 223   | 0.70 [0.41, 1.20]    |
| Hospital mortality               | 42          | 208   | 51          | 193   | 0.70 [0.40, 1.22]    |
| Tracheostomy                     | 29          | 240   | 34          | 223   | 0.76 [0.44, 1.31]    |
| Extubation failure/re-intubation | 13          | 132   | 22          | 123   | 0.52 [0.25, 1.08]    |
| Asynchrony index $\geq 10$       | 6           | 165   | 52          | 153   | 0.13 [0.07, 0.23]    |

Summary of inputs, after conversion to means and standard deviations where necessary, and results from the pragmatic meta-analysis. Results (MD or OR) are shown with 95% CIs. Mean (SD) values are weighted means, where the weight for each study is taken from the RevMan 5.3 output.

ICU, intensive care unit; MD, mean difference (PAV+ mode – PSV); MV, mechanical ventilation; OR, odds ratio (PAV+ mode relative to PSV); PAV+, proportional-assist ventilation with adjustable gain parameters; PSV, pressure support ventilation; SD, standard deviation.

## References

1. Saunders R, Geogopoulos D. Evaluating the Cost-Effectiveness of Proportional-Assist Ventilation Plus vs . Pressure Support Ventilation in the Intensive Care Unit in Two Countries. *Front public Heal.* 2018;6(June):1-8. doi:10.3389/fpubh.2018.00168
2. Bosma KJ, Read BA, Bahrgard Nikoo MJ, Jones PM, Priestap FA, Lewis JF. A Pilot Randomized Trial Comparing Weaning From Mechanical Ventilation on Pressure Support Versus Proportional Assist Ventilation. *Crit Care Med.* 2016;44(2):1-11. doi:10.1097/CCM.0000000000001600
3. Botha J, Green C, Carney I, Haji K, Gupta S, Tiruvoipati R. Proportional assist ventilation versus pressure support ventilation in weaning ventilation: a pilot randomised controlled trial. *Crit Care Resusc.* 2018;20(1):33-40. <http://www.ncbi.nlm.nih.gov/pubmed/29458319>. Accessed June 5, 2019.
4. Elganady AA, Beshey BN, Abdelaziz AAH. Proportional assist ventilation versus pressure support ventilation in the weaning of patients with acute exacerbation of chronic obstructive



1  
2  
3 pulmonary disease. *Egypt J Chest Dis Tuberc.* 2014;63(3):643-650.  
4 doi:10.1016/j.ejcdt.2014.04.001  
5

- 6 5. Xirouchaki N, Kondili E, Vaporidi K, et al. Proportional assist ventilation with load-adjustable  
7 gain factors in critically ill patients: Comparison with pressure support. *Intensive Care Med.*  
8 2008;34(11):2026-2034. doi:10.1007/s00134-008-1209-2  
9
- 10 6. Sasikumar S, Shanbhag V, Shenoy A, Unnikirshanan R. Comparison of pressure support and  
11 proportional assist ventilation plus for weaning from mechanical ventilation in critically ill  
12 patients. *Indian J Crit Care Med.* 2013;17(May 2016):34.  
13 [http://www.embase.com/search/results?subaction=viewrecord&from=export&id=L71239402](http://www.embase.com/search/results?subaction=viewrecord&from=export&id=L71239402%5Cnhttp://rd8hp6du2b.search.serialssolutions.com?sid=EMBASE&issn=09725229&id=doi:&atitle=Comparison+of+pressure+support+and+proportional+assist+ventilation+plus+for+weaning.)  
14 [%5Cnhttp://rd8hp6du2b.search.serialssolutions.com?sid=EMBASE&issn=09725229&id=doi:](http://rd8hp6du2b.search.serialssolutions.com?sid=EMBASE&issn=09725229&id=doi:&atitle=Comparison+of+pressure+support+and+proportional+assist+ventilation+plus+for+weaning.)  
15 [&atitle=Comparison+of+pressure+support+and+proportional+assist+ventilation+plus+for+we](http://rd8hp6du2b.search.serialssolutions.com?sid=EMBASE&issn=09725229&id=doi:&atitle=Comparison+of+pressure+support+and+proportional+assist+ventilation+plus+for+weaning.)  
16 [aning.](http://rd8hp6du2b.search.serialssolutions.com?sid=EMBASE&issn=09725229&id=doi:&atitle=Comparison+of+pressure+support+and+proportional+assist+ventilation+plus+for+weaning.)  
17  
18
- 19 7. Aguirre-Bermeo H, Bottiroli M, Italiano S, et al. Ventilación con presión de soporte y  
20 ventilación proporcional asistida durante la retirada de la ventilación mecánica. *Med Intensiva.*  
21 2014;38(6):363-370. doi:10.1016/j.medin.2013.08.003  
22
- 23 8. Teixeira SN, Osaku EF, Lima de Macedo Costa CR, et al. Comparison of Proportional Assist  
24 Ventilation Plus, T-Tube Ventilation, and Pressure Support Ventilation as Spontaneous  
25 Breathing Trials for Extubation: A Randomized Study. *Respir Care.* 2015;60(11):1527-1535.  
26 doi:10.4187/respcare.03915  
27
- 28 9. Wan X, Wang W, Liu J, Tong T. Estimating the sample mean and standard deviation from the  
29 sample size, median, range and/or interquartile range. *BMC Med Res Methodol.* 2014;14:135.  
30 doi:10.1186/1471-2288-14-135  
31  
32  
33  
34  
35  
36  
37  
38  
39  
40  
41  
42  
43  
44  
45  
46  
47  
48  
49  
50  
51  
52  
53  
54  
55  
56  
57  
58  
59  
60
